# Supplementary material
Source: publisher figshare collection journal article supplement (https://acs.figshare.com/ndownloader/files/5131771)
Supplement: Supplementary file 1 [file 5131771]

 
data_01243 
 
_audit_creation_method            SHELXL-97 
_chemical_name_systematic 
; 
 ? 
; 
_chemical_name_common             01243 
_chemical_melting_point           ? 
_chemical_formula_moiety          'C18 H42 Br2 Ni2 Si4' 
_chemical_formula_sum             'C18 H42 Br2 Ni2 Si4' 
_chemical_formula_weight          648.12 
 
loop_ 
 _atom_type_symbol 
 _atom_type_description 
 _atom_type_scat_dispersion_real 
 _atom_type_scat_dispersion_imag 
 _atom_type_scat_source 
 'C'  'C'   0.0033   0.0016 
 'International Tables Vol C Tables 4.2.6.8 and 6.1.1.4' 
 'H'  'H'   0.0000   0.0000 
 'International Tables Vol C Tables 4.2.6.8 and 6.1.1.4' 
 'Si'  'Si'   0.0817   0.0704 
 'International Tables Vol C Tables 4.2.6.8 and 6.1.1.4' 
 'Ni'  'Ni'   0.3393   1.1124 
 'International Tables Vol C Tables 4.2.6.8 and 6.1.1.4' 
 'Br'  'Br'  -0.2901   2.4595 
 'International Tables Vol C Tables 4.2.6.8 and 6.1.1.4' 
 
_symmetry_cell_setting            monoclinic 
_symmetry_space_group_name_H-M    C2/c 
 
loop_ 
 _symmetry_equiv_pos_as_xyz 
 'x, y, z' 
 '-x, y, -z+1/2' 
 'x+1/2, y+1/2, z' 
 '-x+1/2, y+1/2, -z+1/2' 
 '-x, -y, -z' 
 'x, -y, z-1/2' 
 '-x+1/2, -y+1/2, -z' 
 'x+1/2, -y+1/2, z-1/2' 
 
_cell_length_a                    14.819(7) 
_cell_length_b                    23.37(1) 
_cell_length_c                    11.251(5) 
_cell_angle_alpha                 90.00 
_cell_angle_beta                  130.197(8) 
_cell_angle_gamma                 90.00 
_cell_volume                      2976(2) 
_cell_formula_units_Z             4 
_cell_measurement_temperature     173(2) 
_cell_measurement_reflns_used     1988 
_cell_measurement_theta_min       ? 
_cell_measurement_theta_max       ? 
 
_exptl_crystal_description        plate 
_exptl_crystal_colour             purple 
_exptl_crystal_size_max           0.24 
_exptl_crystal_size_mid           0.14 
_exptl_crystal_size_min           0.04 
_exptl_crystal_density_meas       ? 
_exptl_crystal_density_diffrn     1.447 
_exptl_crystal_density_method     'not measured' 
_exptl_crystal_F_000              1328 
_exptl_absorpt_coefficient_mu     4.115 
_exptl_absorpt_correction_type    none 
_exptl_absorpt_correction_T_min   0.4384 
_exptl_absorpt_correction_T_max   0.8527 
_exptl_absorpt_process_details    ? 
 
_exptl_special_details 
; 
 All attempts at using an absorption correction (SADABS) caused systematic
 errors to be present (large residual electron density peaks [1-2 electrons
 per cubic Angstrom] and thermal ellipsoids whose directions were consistent
 and in an unlikely direction.  However, when no absorption correction was
 applied, the data appeared normal.  The R1 value from the refinement when
 an absorption correction was applied was worse by 2.5%.

 One explanation may be that, despite 98.5% coverage to a resolution of
 50 degrees, there was insufficient redundant data to allow for a reasonable
 absorption correction.
; 
 
_diffrn_ambient_temperature       173(2) 
_diffrn_radiation_wavelength      0.71073 
_diffrn_radiation_type            MoK\a 
_diffrn_radiation_source          'normal-focus sealed tube' 
_diffrn_radiation_monochromator   graphite 
_diffrn_measurement_device_type   'Bruker SMART Platform CCD' 
_diffrn_measurement_method        'area detector, \w scans per \f' 
_diffrn_detector_area_resol_mean  ? 
_diffrn_standards_number          ? 
_diffrn_standards_interval_count  ? 
_diffrn_standards_interval_time   ? 
_diffrn_standards_decay_%         ? 
_diffrn_reflns_number             6593 
_diffrn_reflns_av_R_equivalents   0.0727 
_diffrn_reflns_av_sigmaI/netI     0.0836 
_diffrn_reflns_limit_h_min        -17 
_diffrn_reflns_limit_h_max        13 
_diffrn_reflns_limit_k_min        0 
_diffrn_reflns_limit_k_max        27 
_diffrn_reflns_limit_l_min        0 
_diffrn_reflns_limit_l_max        13 
_diffrn_reflns_theta_min          1.74 
_diffrn_reflns_theta_max          25.03 
_reflns_number_total              2604 
_reflns_number_gt                 1462 
_reflns_threshold_expression      >2sigma(I) 
 
_computing_data_collection        'SMART, Bruker' 
_computing_cell_refinement        'SAINT, Bruker' 
_computing_data_reduction         'SAINT, Bruker' 
_computing_structure_solution     'SHELXS-97 (Sheldrick, 1997)' 
_computing_structure_refinement   'SHELXL-97 (Sheldrick, 1997)' 
_computing_molecular_graphics     'SHELXTL, Bruker' 
_computing_publication_material   ? 
 
_refine_special_details 
; 
 Refinement of F^2^ against ALL reflections.  The weighted R-factor wR and 
 goodness of fit S are based on F^2^, conventional R-factors R are based 
 on F, with F set to zero for negative F^2^. The threshold expression of 
 F^2^ > 2sigma(F^2^) is used only for calculating R-factors(gt) etc. and is 
 not relevant to the choice of reflections for refinement.  R-factors based 
 on F^2^ are statistically about twice as large as those based on F, and R- 
 factors based on ALL data will be even larger. 
; 
 
_refine_ls_structure_factor_coef  Fsqd  
_refine_ls_matrix_type            full 
_refine_ls_weighting_scheme       calc  
_refine_ls_weighting_details 
; calc 
 [0.00000+1.00000exp(1.00(sin\q/\l)^2^)]/ 
   [\s^2^(Fo^2^)+0.0000+0.0000*P+(0.0635P)^2^+0.0000sin\q/\l] 
 where P = 0.33333Fo^2^ + 0.66667Fc^2^ 
; 
_atom_sites_solution_primary      direct 
_atom_sites_solution_secondary    difmap 
_atom_sites_solution_hydrogens    geom 
_refine_ls_hydrogen_treatment     constr 
_refine_ls_extinction_method      none 
_refine_ls_extinction_coef        ? 
_refine_ls_number_reflns          2604 
_refine_ls_number_parameters      131 
_refine_ls_number_restraints      0 
_refine_ls_R_factor_all           0.1025 
_refine_ls_R_factor_gt            0.0520 
_refine_ls_wR_factor_ref          0.1286 
_refine_ls_wR_factor_gt           0.1132 
_refine_ls_goodness_of_fit_ref    1.013 
_refine_ls_restrained_S_all       1.013 
_refine_ls_shift/su_max           0.000 
_refine_ls_shift/su_mean          0.000 
 
loop_ 
 _atom_site_label 
 _atom_site_type_symbol 
 _atom_site_fract_x 
 _atom_site_fract_y 
 _atom_site_fract_z 
 _atom_site_U_iso_or_equiv 
 _atom_site_adp_type 
 _atom_site_occupancy 
 _atom_site_symmetry_multiplicity 
 _atom_site_calc_flag 
 _atom_site_refinement_flags 
 _atom_site_disorder_assembly 
 _atom_site_disorder_group 
Ni1 Ni 0.39544(7) -0.05352(4) 0.26670(10) 0.0378(3) Uani 1 1 d . . . 
Br1 Br 0.5095(11) -0.12454(6) 0.2679(16) 0.0753(19) Uani 0.50 1 d P . -1 
Br2 Br 0.5000 0.01784(4) 0.2500 0.0430(3) Uani 1 2 d S . . 
C1 C 0.3164(6) -0.1047(3) 0.3258(10) 0.053(2) Uani 1 1 d . . . 
H1A H 0.3567 -0.1004 0.4387 0.064 Uiso 1 1 calc R . . 
C2 C 0.2514(6) -0.0562(3) 0.2437(9) 0.0487(18) Uani 1 1 d . . . 
H2A H 0.1723 -0.0602 0.1378 0.058 Uiso 1 1 calc R . . 
C3 C 0.3053(6) 0.0002(3) 0.3004(8) 0.0408(17) Uani 1 1 d . . . 
H3A H 0.3466 0.0049 0.4134 0.049 Uiso 1 1 calc R . . 
Si1 Si 0.26279(17) -0.18021(8) 0.2593(3) 0.0482(6) Uani 1 1 d . . . 
C4 C 0.3924(7) -0.2301(4) 0.3857(11) 0.077(3) Uani 1 1 d . . . 
H4A H 0.4460 -0.2251 0.3637 0.116 Uiso 1 1 calc R . . 
H4B H 0.3641 -0.2697 0.3638 0.116 Uiso 1 1 calc R . . 
H4C H 0.4344 -0.2214 0.4955 0.116 Uiso 1 1 calc R . . 
C5 C 0.1888(7) -0.1912(4) 0.0513(9) 0.068(2) Uani 1 1 d . . . 
H5A H 0.2448 -0.1832 0.0345 0.102 Uiso 1 1 calc R . . 
H5B H 0.1211 -0.1652 -0.0127 0.102 Uiso 1 1 calc R . . 
H5C H 0.1615 -0.2309 0.0222 0.102 Uiso 1 1 calc R . . 
C6 C 0.1532(7) -0.1943(3) 0.2892(10) 0.064(2) Uani 1 1 d . . . 
H6A H 0.0829 -0.1705 0.2174 0.096 Uiso 1 1 calc R . . 
H6B H 0.1893 -0.1849 0.3966 0.096 Uiso 1 1 calc R . . 
H6C H 0.1305 -0.2347 0.2691 0.096 Uiso 1 1 calc R . . 
Si2 Si 0.22464(17) 0.06640(8) 0.1887(2) 0.0433(5) Uani 1 1 d . . . 
C7 C 0.3281(7) 0.1280(3) 0.2576(10) 0.063(2) Uani 1 1 d . . . 
H7A H 0.3796 0.1308 0.3712 0.094 Uiso 1 1 calc R . . 
H7B H 0.2826 0.1634 0.2104 0.094 Uiso 1 1 calc R . . 
H7C H 0.3764 0.1220 0.2275 0.094 Uiso 1 1 calc R . . 
C8 C 0.1364(8) 0.0540(4) -0.0255(9) 0.069(2) Uani 1 1 d . . . 
H8A H 0.0845 0.0209 -0.0584 0.104 Uiso 1 1 calc R . . 
H8B H 0.1902 0.0467 -0.0463 0.104 Uiso 1 1 calc R . . 
H8C H 0.0886 0.0880 -0.0834 0.104 Uiso 1 1 calc R . . 
C9 C 0.1237(7) 0.0832(4) 0.2300(11) 0.069(2) Uani 1 1 d . . . 
H9A H 0.0628 0.0536 0.1841 0.104 Uiso 1 1 calc R . . 
H9B H 0.0862 0.1205 0.1847 0.104 Uiso 1 1 calc R . . 
H9C H 0.1694 0.0844 0.3427 0.104 Uiso 1 1 calc R . . 
 
loop_ 
 _atom_site_aniso_label 
 _atom_site_aniso_U_11 
 _atom_site_aniso_U_22 
 _atom_site_aniso_U_33 
 _atom_site_aniso_U_23 
 _atom_site_aniso_U_13 
 _atom_site_aniso_U_12 
Ni1 0.0288(5) 0.0365(5) 0.0487(6) 0.0014(5) 0.0253(4) 0.0014(4) 
Br1 0.076(4) 0.0413(8) 0.154(6) 0.037(3) 0.095(4) 0.024(3) 
Br2 0.0448(6) 0.0374(6) 0.0591(7) 0.000 0.0392(6) 0.000 
C1 0.041(4) 0.064(5) 0.068(5) 0.010(4) 0.042(4) 0.008(4) 
C2 0.042(4) 0.060(5) 0.058(5) 0.015(4) 0.038(4) 0.007(4) 
C3 0.037(4) 0.045(4) 0.051(5) -0.005(4) 0.034(4) -0.004(3) 
Si1 0.0395(11) 0.0402(12) 0.0699(15) 0.0008(11) 0.0376(12) -0.0024(9) 
C4 0.056(6) 0.073(6) 0.097(7) 0.021(5) 0.047(6) 0.007(5) 
C5 0.052(5) 0.074(6) 0.074(6) -0.001(5) 0.039(5) -0.002(4) 
C6 0.062(5) 0.065(5) 0.083(6) -0.007(5) 0.054(5) -0.010(4) 
Si2 0.0357(11) 0.0412(12) 0.0528(13) 0.0012(10) 0.0285(10) 0.0010(8) 
C7 0.057(5) 0.043(4) 0.081(6) 0.004(4) 0.041(5) 0.004(4) 
C8 0.070(5) 0.069(5) 0.054(5) 0.015(5) 0.032(5) 0.008(5) 
C9 0.052(5) 0.064(5) 0.100(7) 0.003(5) 0.052(5) 0.011(4) 
 
_geom_special_details 
; 
 All esds (except the esd in the dihedral angle between two l.s. planes) 
 are estimated using the full covariance matrix.  The cell esds are taken 
 into account individually in the estimation of esds in distances, angles 
 and torsion angles; correlations between esds in cell parameters are only 
 used when they are defined by crystal symmetry.  An approximate (isotropic) 
 treatment of cell esds is used for estimating esds involving l.s. planes. 
; 
 
loop_ 
 _geom_bond_atom_site_label_1 
 _geom_bond_atom_site_label_2 
 _geom_bond_distance 
 _geom_bond_site_symmetry_2 
 _geom_bond_publ_flag 
Ni1 C2 1.978(6) . ? 
Ni1 C3 2.039(6) . ? 
Ni1 C1 2.062(7) . ? 
Ni1 Br1 2.362(10) . ? 
Ni1 Br2 2.3648(13) . ? 
Ni1 Br1 2.366(10) 2_655 ? 
Br1 Ni1 2.366(10) 2_655 ? 
Br2 Ni1 2.3647(13) 2_655 ? 
C1 C2 1.385(9) . ? 
C1 Si1 1.880(8) . ? 
C1 H1A 1.0000 . ? 
C2 C3 1.457(9) . ? 
C2 H2A 1.0000 . ? 
C3 Si2 1.861(7) . ? 
C3 H3A 1.0000 . ? 
Si1 C5 1.852(8) . ? 
Si1 C4 1.883(8) . ? 
Si1 C6 1.887(7) . ? 
C4 H4A 0.9800 . ? 
C4 H4B 0.9800 . ? 
C4 H4C 0.9800 . ? 
C5 H5A 0.9800 . ? 
C5 H5B 0.9800 . ? 
C5 H5C 0.9800 . ? 
C6 H6A 0.9800 . ? 
C6 H6B 0.9800 . ? 
C6 H6C 0.9800 . ? 
Si2 C7 1.868(7) . ? 
Si2 C9 1.871(7) . ? 
Si2 C8 1.880(8) . ? 
C7 H7A 0.9800 . ? 
C7 H7B 0.9800 . ? 
C7 H7C 0.9800 . ? 
C8 H8A 0.9800 . ? 
C8 H8B 0.9800 . ? 
C8 H8C 0.9800 . ? 
C9 H9A 0.9800 . ? 
C9 H9B 0.9800 . ? 
C9 H9C 0.9800 . ? 
 
loop_ 
 _geom_angle_atom_site_label_1 
 _geom_angle_atom_site_label_2 
 _geom_angle_atom_site_label_3 
 _geom_angle 
 _geom_angle_site_symmetry_1 
 _geom_angle_site_symmetry_3 
 _geom_angle_publ_flag 
C2 Ni1 C3 42.5(3) . . ? 
C2 Ni1 C1 40.0(3) . . ? 
C3 Ni1 C1 73.8(3) . . ? 
C2 Ni1 Br1 133.3(3) . . ? 
C3 Ni1 Br1 169.6(4) . . ? 
C1 Ni1 Br1 98.3(3) . . ? 
C2 Ni1 Br2 136.0(2) . . ? 
C3 Ni1 Br2 97.02(19) . . ? 
C1 Ni1 Br2 166.5(2) . . ? 
Br1 Ni1 Br2 89.6(2) . . ? 
C2 Ni1 Br1 131.5(3) . 2_655 ? 
C3 Ni1 Br1 173.5(3) . 2_655 ? 
C1 Ni1 Br1 99.7(3) . 2_655 ? 
Br1 Ni1 Br1 7.5(7) . 2_655 ? 
Br2 Ni1 Br1 89.5(2) . 2_655 ? 
Ni1 Br1 Ni1 90.35(8) . 2_655 ? 
Ni1 Br2 Ni1 90.32(6) 2_655 . ? 
C2 C1 Si1 124.7(6) . . ? 
C2 C1 Ni1 66.7(4) . . ? 
Si1 C1 Ni1 126.7(4) . . ? 
C2 C1 H1A 110.7 . . ? 
Si1 C1 H1A 110.7 . . ? 
Ni1 C1 H1A 110.7 . . ? 
C1 C2 C3 120.0(7) . . ? 
C1 C2 Ni1 73.3(4) . . ? 
C3 C2 Ni1 71.0(4) . . ? 
C1 C2 H2A 119.7 . . ? 
C3 C2 H2A 119.7 . . ? 
Ni1 C2 H2A 119.7 . . ? 
C2 C3 Si2 121.6(5) . . ? 
C2 C3 Ni1 66.5(3) . . ? 
Si2 C3 Ni1 126.8(4) . . ? 
C2 C3 H3A 111.6 . . ? 
Si2 C3 H3A 111.6 . . ? 
Ni1 C3 H3A 111.6 . . ? 
C5 Si1 C1 112.7(4) . . ? 
C5 Si1 C4 110.6(4) . . ? 
C1 Si1 C4 108.5(4) . . ? 
C5 Si1 C6 109.0(4) . . ? 
C1 Si1 C6 106.5(3) . . ? 
C4 Si1 C6 109.4(4) . . ? 
Si1 C4 H4A 109.5 . . ? 
Si1 C4 H4B 109.5 . . ? 
H4A C4 H4B 109.5 . . ? 
Si1 C4 H4C 109.5 . . ? 
H4A C4 H4C 109.5 . . ? 
H4B C4 H4C 109.5 . . ? 
Si1 C5 H5A 109.5 . . ? 
Si1 C5 H5B 109.5 . . ? 
H5A C5 H5B 109.5 . . ? 
Si1 C5 H5C 109.5 . . ? 
H5A C5 H5C 109.5 . . ? 
H5B C5 H5C 109.5 . . ? 
Si1 C6 H6A 109.5 . . ? 
Si1 C6 H6B 109.5 . . ? 
H6A C6 H6B 109.5 . . ? 
Si1 C6 H6C 109.5 . . ? 
H6A C6 H6C 109.5 . . ? 
H6B C6 H6C 109.5 . . ? 
C3 Si2 C7 111.3(3) . . ? 
C3 Si2 C9 105.9(3) . . ? 
C7 Si2 C9 108.0(4) . . ? 
C3 Si2 C8 110.5(4) . . ? 
C7 Si2 C8 110.9(4) . . ? 
C9 Si2 C8 110.2(4) . . ? 
Si2 C7 H7A 109.5 . . ? 
Si2 C7 H7B 109.5 . . ? 
H7A C7 H7B 109.5 . . ? 
Si2 C7 H7C 109.5 . . ? 
H7A C7 H7C 109.5 . . ? 
H7B C7 H7C 109.5 . . ? 
Si2 C8 H8A 109.5 . . ? 
Si2 C8 H8B 109.5 . . ? 
H8A C8 H8B 109.5 . . ? 
Si2 C8 H8C 109.5 . . ? 
H8A C8 H8C 109.5 . . ? 
H8B C8 H8C 109.5 . . ? 
Si2 C9 H9A 109.5 . . ? 
Si2 C9 H9B 109.5 . . ? 
H9A C9 H9B 109.5 . . ? 
Si2 C9 H9C 109.5 . . ? 
H9A C9 H9C 109.5 . . ? 
H9B C9 H9C 109.5 . . ? 
 
loop_ 
 _geom_torsion_atom_site_label_1 
 _geom_torsion_atom_site_label_2 
 _geom_torsion_atom_site_label_3 
 _geom_torsion_atom_site_label_4 
 _geom_torsion 
 _geom_torsion_site_symmetry_1 
 _geom_torsion_site_symmetry_2 
 _geom_torsion_site_symmetry_3 
 _geom_torsion_site_symmetry_4 
 _geom_torsion_publ_flag 
C2 Ni1 Br1 Ni1 165.1(3) . . . 2_655 ? 
C3 Ni1 Br1 Ni1 -133.2(16) . . . 2_655 ? 
C1 Ni1 Br1 Ni1 -172.8(4) . . . 2_655 ? 
Br2 Ni1 Br1 Ni1 -3.7(3) . . . 2_655 ? 
Br1 Ni1 Br1 Ni1 86(4) 2_655 . . 2_655 ? 
C2 Ni1 Br2 Ni1 -164.6(3) . . . 2_655 ? 
C3 Ni1 Br2 Ni1 175.7(2) . . . 2_655 ? 
C1 Ni1 Br2 Ni1 129.7(9) . . . 2_655 ? 
Br1 Ni1 Br2 Ni1 3.8(3) . . . 2_655 ? 
Br1 Ni1 Br2 Ni1 -3.7(3) 2_655 . . 2_655 ? 
C3 Ni1 C1 C2 32.1(5) . . . . ? 
Br1 Ni1 C1 C2 -154.8(6) . . . . ? 
Br2 Ni1 C1 C2 80.0(10) . . . . ? 
Br1 Ni1 C1 C2 -147.4(5) 2_655 . . . ? 
C2 Ni1 C1 Si1 116.9(7) . . . . ? 
C3 Ni1 C1 Si1 149.0(5) . . . . ? 
Br1 Ni1 C1 Si1 -37.9(5) . . . . ? 
Br2 Ni1 C1 Si1 -163.1(5) . . . . ? 
Br1 Ni1 C1 Si1 -30.5(6) 2_655 . . . ? 
Si1 C1 C2 C3 -175.1(5) . . . . ? 
Ni1 C1 C2 C3 -55.5(5) . . . . ? 
Si1 C1 C2 Ni1 -119.6(6) . . . . ? 
C3 Ni1 C2 C1 -131.0(7) . . . . ? 
Br1 Ni1 C2 C1 35.4(8) . . . . ? 
Br2 Ni1 C2 C1 -160.7(4) . . . . ? 
Br1 Ni1 C2 C1 45.2(7) 2_655 . . . ? 
C1 Ni1 C2 C3 131.0(7) . . . . ? 
Br1 Ni1 C2 C3 166.4(6) . . . . ? 
Br2 Ni1 C2 C3 -29.7(5) . . . . ? 
Br1 Ni1 C2 C3 176.2(5) 2_655 . . . ? 
C1 C2 C3 Si2 176.5(5) . . . . ? 
Ni1 C2 C3 Si2 119.9(5) . . . . ? 
C1 C2 C3 Ni1 56.6(6) . . . . ? 
C1 Ni1 C3 C2 -30.4(4) . . . . ? 
Br1 Ni1 C3 C2 -71.4(19) . . . . ? 
Br2 Ni1 C3 C2 159.7(4) . . . . ? 
Br1 Ni1 C3 C2 -26(3) 2_655 . . . ? 
C2 Ni1 C3 Si2 -112.9(6) . . . . ? 
C1 Ni1 C3 Si2 -143.3(5) . . . . ? 
Br1 Ni1 C3 Si2 175.7(16) . . . . ? 
Br2 Ni1 C3 Si2 46.7(4) . . . . ? 
Br1 Ni1 C3 Si2 -138(3) 2_655 . . . ? 
C2 C1 Si1 C5 44.7(7) . . . . ? 
Ni1 C1 Si1 C5 -40.5(6) . . . . ? 
C2 C1 Si1 C4 167.6(6) . . . . ? 
Ni1 C1 Si1 C4 82.3(6) . . . . ? 
C2 C1 Si1 C6 -74.7(7) . . . . ? 
Ni1 C1 Si1 C6 -160.0(4) . . . . ? 
C2 C3 Si2 C7 -163.2(5) . . . . ? 
Ni1 C3 Si2 C7 -80.3(5) . . . . ? 
C2 C3 Si2 C9 79.8(6) . . . . ? 
Ni1 C3 Si2 C9 162.7(4) . . . . ? 
C2 C3 Si2 C8 -39.5(6) . . . . ? 
Ni1 C3 Si2 C8 43.4(5) . . . . ? 
 
_diffrn_measured_fraction_theta_max    0.985 
_diffrn_reflns_theta_full              25.03 
_diffrn_measured_fraction_theta_full   0.985 
_refine_diff_density_max    0.769 
_refine_diff_density_min   -0.486 
_refine_diff_density_rms    0.127 
